# Supplementary material for: Magnetoelectric coupling tailored by the orientation of the nanocrystals in only one component in percolative multiferroic composites
Source: Royal Society of Chemistry journal article supplement (doi:10.1039/c9ra03291f), 2019-01-01
Supplement: c9ra03291f1.pdf [file c9ra03291f1.pdf]

Supplementary Information

## **Magnetoelectric coupling tailored by the orientation of the nanocrystals of only one component in percolative multiferroic composite**

Yu Tang<sup>1,3</sup>, Ruixin Wang<sup>1</sup>, Yi Zhang<sup>2,\*</sup>, Bin Xiao<sup>4</sup>, Shun Li<sup>1</sup>, Piyi Du<sup>3,\*</sup>

1. Department of Materials Science and Engineering, College of Aerospace Science and Engineering, National University of Defense Technology, Changsha 410073, China

2. Department of Physics, College of Liberal Arts and Sciences, National University of Defense Technology, Changsha 410073, China

3. State Key Laboratory of Silicon Materials, School of Materials Science and Engineering, Zhejiang University, Hangzhou 310027, China

4. Department of Materials Science and Engineering, Shenzhen Engineering Research Center for Novel Electronic Information Materials and Devices, Southern University of Science and Technology, Shenzhen 518055, China

Email address: [zhangyi1983@zju.edu.cn](mailto:zhangyi1983@zju.edu.cn), [dupy@zju.edu.cn](mailto:dupy@zju.edu.cn)

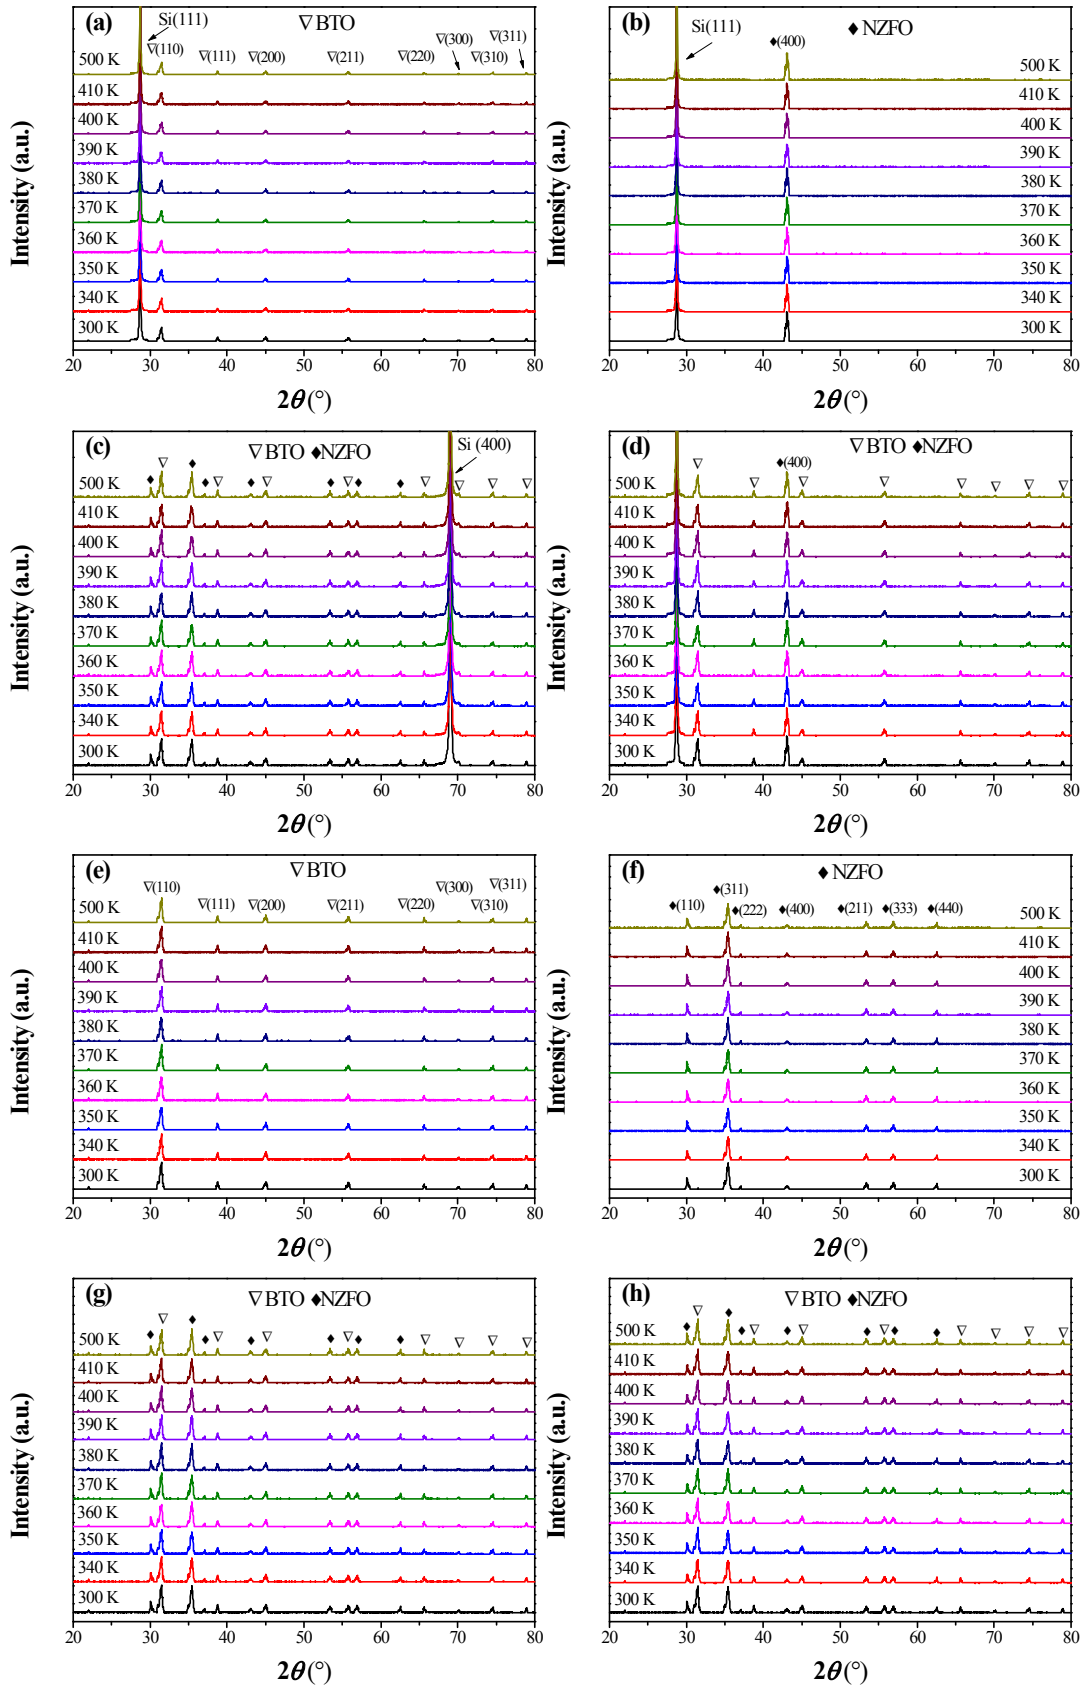

**Fig. S1** XRD patterns of (a) and (e) BTO, (b) and (f) (100) oriented NZFO single phase thin film, 0.5BTO-0.5NZFO composite thin film (c) and (g) without specific oriented and (d) and (h) with (100) oriented ferrite measured by normal and GID technology, respectively.
